# Supplementary material
Source: PubMed Central journal article supplement (PMC6628596)

## Supplementary Online Content

Xu H, Yang R, Qi X, et al. Association of lifespan cognitive reserve indicator with dementia risk in the presence of brain pathologies. *JAMA Neurol*. Published online July 14, 2019. doi:10.1001/jamaneurol.2019.2455

**eMethods 1.** Covariate details

**eMethods 2.** SEM computation details

**eTable 1.** Pearson correlation coefficient matrix of observed contributors to cognitive reserve indicator included in the calculation of a latent variable

**eTable 2.** Baseline and neuropathological characteristics of the 611 autopsied participants by dementia

**eTable 3.** Association of brain pathologies with middle and highest cognitive reserve at baseline using multinomial logistic regression

**eTable 4.** Hazard ratios (HRs) with 95% CIs of dementia and Alzheimer disease–related dementia in relation to cognitive reserve among participants with autopsies

**eTable 5.** Incidence rates (per 1000 person-years) of dementia and Alzheimer disease–related dementia by different levels of cognitive reserve and brain pathologies

**eTable 6.** Hazard ratios (HRs) with 95% CIs of the association of levels of cognitive reserve with dementia and Alzheimer disease–related dementia with multiple imputation for missing data

**eTable 7.** Hazard ratios (HRs) and 95% CIs of the association of cognitive reserve with dementia and Alzheimer disease–related dementia after excluding MCI

**eTable 8.** Hazard ratios (HRs) and 95% CIs of the association of cognitive reserve with dementia and Alzheimer disease–related dementia among all participants: results from competing risk models

**eTable 9.** Hazard ratios (HRs) and 95% CIs of the association of cognitive reserve<sup>a</sup> with dementia and Alzheimer disease–related dementia among all participants

**eTable 10.** Hazard ratios (HRs) and 95% CIs of the association of cognitive reserve<sup>a</sup> with dementia and Alzheimer disease–related dementia among all participants

**eTable 11.** Hazard ratios (HRs) and 95% CIs of the associations of individual cognitive reserve indicators with dementia and Alzheimer disease–related dementia among all participants

**eFigure 1.** Participant flow chart

**eFigure 2.** Kaplan-Meier survival curves of dementia by cognitive reserve

This supplementary material has been provided by the authors to give readers additional information about their work.

## **eMethods 1. Covariate details**

Smoking was categorized as never smoked, former smoker and current smoker. Alcohol consumption was categorized into no/occasional drinking *vs.* light-to-heavy drinking. Physical activity was assessed using questions adapted from the 1985 National Health Interview Survey, which measured the sum of hours per week that the participant engaged in 5 categories of activities including walking for exercise, gardening or yard work, calisthenics or general exercise, bicycle riding (including stationary bikes) and swimming or water exercises. Height and weight were measured when participants with light clothes but without shoes. Body mass index (BMI) was calculated as weight in kilograms divided by height in meters squared. Cognitive function (Mini-Mental State Examination, MMSE) were collected at each wave through structured interviews. Cardiovascular diseases (heart disease, and hypertension) and diabetes was collected based on self-report during the interview and clinical examination at baseline. Cerebrovascular disease was ascertained based on self-report and a neurological examination.

## **eMethods 2. SEM computation details**

Structural equation modeling (SEM) was performed to derive a best-fitting measurement model to construct the lifespan CR based on stimulating mental and social activities during life course, using full information maximum likelihood. The model fit was assessed using chi-square ( $\chi^2$ ) goodness of fit, the comparative fit index (CFI), standardized root mean squared residual (SRMR) and the root mean square error of approximation (RMSEA). Cognitive activities at distinct stages across the life course, including years of education, cognitive activities in early-, mid- and late-life, social activity and social network in late life were initially incorporated in the SEM to generate the latent variable of lifespan CR score. Because the factor loading of social network was low making the model fit unsatisfactory, thus it was excluded from the final model. The predicted values (as scores) of the CR were obtained by summing the products of standardized observed factors and the corresponding SEM-factor score weights.

**eTable 1.** Pearson correlation coefficient matrix of observed contributors to cognitive reserve indicator included in the calculation of a latent variable

|                               | <b>Years of education</b> | <b>Early-life cognitive activity</b> | <b>Middle-age cognitive activity</b> | <b>Late-life cognitive activity</b> |
|-------------------------------|---------------------------|--------------------------------------|--------------------------------------|-------------------------------------|
| Years of education            | 1.00                      |                                      |                                      |                                     |
| Early-life cognitive activity | 0.41                      | 1.00                                 |                                      |                                     |
| Mid-life cognitive activity   | 0.43                      | 0.64                                 | 1.00                                 |                                     |
| Late-life cognitive activity  | 0.29                      | 0.41                                 | 0.49                                 | 1.00                                |
| Social activity in late life  | 0.17                      | 0.25                                 | 0.27                                 | 0.31                                |

Pearson correlation coefficient, (R)

**eTable 2.** Baseline and neuropathological characteristics of the 611 autopsied participants by dementia

| Characteristics                               | Dementia-free<br>n=370 | Incident dementia<br>n=241 | p     |
|-----------------------------------------------|------------------------|----------------------------|-------|
| Age, mean (SD), y                             | 82.38 (6.2)            | 83.97 (5.3)                | <.001 |
| Female                                        | 261 (70.5)             | 179 (74.3)                 | .31   |
| Life-course cognitive reserve factors         |                        |                            |       |
| Years of education, mean (SD), y              | 14.65 (2.8)            | 14.48 (2.9)                | .46   |
| Early-life cognitive activity, mean (SD)      | 3.04 (0.6)             | 2.97 (0.6)                 | .13   |
| Mid-life cognitive activity, mean (SD)        | 3.33 (0.6)             | 3.23 (0.7)                 | .06   |
| Late-life cognitive activity, mean (SD)       | 3.28 (0.7)             | 3.12 (0.8)                 | .01   |
| Social activity in late life, mean (SD)       | 2.57 (0.6)             | 2.49 (0.6)                 | .08   |
| Social network, median (IQR)                  | 5.00 (3.00–10.00)      | 5.00 (2.00–9.00)           | .06   |
| Smoking status                                |                        |                            |       |
| Never                                         | 219 (59.2)             | 155 (64.3)                 |       |
| Ever smoker                                   | 142 (38.4)             | 80 (33.2)                  |       |
| Current smoker                                | 9 (2.4)                | 6 (2.5)                    |       |
| Alcohol consumption                           |                        |                            |       |
| Never/occasional                              | 243 (66.7)             | 167 (69.3)                 | .47   |
| Light/moderate                                | 82 (22.2)              | 52 (21.6)                  |       |
| Heavy                                         | 45 (12.2)              | 22 (9.1)                   |       |
| Physical activities, median (IQR)             | 1.88 (0.50–3.58)       | 2.33 (1.00–4.17)           | .69   |
| Body mass index, mean (SD), kg/m <sup>2</sup> | 26.76 (4.9)            | 26.36 (4.5)                | .31   |
| Type 2 diabetes                               | 49 (13.2)              | 23 (9.5)                   | .17   |
| Hypertension                                  | 270 (73.0)             | 152 (63.1)                 | .009  |
| Heart disease                                 | 54 (14.6)              | 19 (7.9)                   | .01   |
| Cerebrovascular disease                       | 43 (12.1)              | 28 (12.2)                  | .98   |
| MMSE, median (IQR)                            | 28.00 (27.00–29.00)    | 28.00 (26.00–29.00)        | <.001 |
| Any APOE ε4 carriers                          | 56 (15.3)              | 77 (32.1)                  | <.001 |
| AD pathologies                                |                        |                            |       |
| Global AD pathology burden, median (IQR)      | 0.45 (0.11–0.91)       | 0.89 (0.41–1.45)           | <.001 |
| Amyloid beta protein, median (IQR)            | 2.60 (0.27–6.29)       | 6.00 (2.67–8.59)           | <.001 |
| Neurofibrillary tangles, median (IQR)         | 3.19 (1.32–6.09)       | 7.56 (3.45–15.19)          | <.001 |
| Chronic infarcts                              |                        |                            |       |
| Gross infarcts                                | 119 (32.3)             | 103 (42.7)                 | .009  |
| Microscopic infarcts                          | 102 (27.6)             | 78 (32.4)                  | .21   |
| Vascular disease pathology                    |                        |                            |       |
| Cerebral atherosclerosis                      | 276 (74.8)             | 205 (85.1)                 | .002  |
| Cerebral amyloid angiopathy                   | 271 (73.4)             | 204 (84.7)                 | .001  |
| Arteriolosclerosis                            | 245 (66.6)             | 179 (74.3)                 | .04   |
| Lewy bodies                                   | 64 (17.7)              | 79 (34.2)                  | <.001 |
| Hippocampal sclerosis                         | 8 (2.2)                | 40 (16.6)                  | <.001 |

Data are presented as mean (SD), median (IQR) or number (proportion %).

Abbreviations: SD, standard deviation; IQR, interquartile range; APOE ε4, apolipoprotein ε4 allele; MMSE, Mini-Mental State Examination.

Missing data: BMI=11, cerebrovascular disease=26, APOE ε4=6, MMSE=1, amyloid beta protein=14, neurofibrillary tangles=12, Lewy bodies=19.

**eTable 3.** Association of brain pathologies with middle and highest cognitive reserve at baseline using multinomial logistic regression

| Brain pathologies           | Middle cognitive reserve<br>(n=203) | Highest cognitive reserve<br>(n=195) |
|-----------------------------|-------------------------------------|--------------------------------------|
|                             | OR (95% CI) <sup>a</sup>            | OR (95% CI) <sup>a</sup>             |
| AD pathologies              |                                     |                                      |
| Global AD pathology burden  | 0.89 (0.62–1.28)                    | 0.78 (0.54–1.12)                     |
| Amyloid beta protein        | 0.99 (0.95–1.05)                    | 0.99 (0.94–1.04)                     |
| Neurofibrillary tangles     | 0.99 (0.96–1.02)                    | 0.97 (0.95–1.00)                     |
| Chronic infarcts            |                                     |                                      |
| Gross infarcts              | 0.87 (0.57–1.34)                    | 0.49 (0.31–0.78)                     |
| Microscopic infarcts        | 1.00 (0.64–1.57)                    | 1.00 (0.63–1.59)                     |
| Vascular disease pathology  |                                     |                                      |
| Cerebral atherosclerosis    | 0.71 (0.41–1.22)                    | 1.04 (0.59–1.83)                     |
| Cerebral amyloid angiopathy | 0.76 (0.45–1.26)                    | 0.88 (0.52–1.47)                     |
| Arteriolosclerosis          | 1.24 (0.78–1.99)                    | 1.63 (1.00–2.65)                     |
| Lewy bodies                 | 1.30 (0.79–2.14)                    | 1.04 (0.61–1.77)                     |
| Hippocampal sclerosis       | 0.76 (0.33–1.72)                    | 1.30 (0.59–2.86)                     |

MCI: mild cognitive impairment

<sup>a</sup> Adjusted for age, sex, smoking, alcohol consumption, BMI, physical activity, heart disease, hypertension, cerebrovascular disease, diabetes, *APOE* ε4, and MMSE;

Missing data: BMI=11, cerebrovascular disease =26, *APOE* ε4=6, MMSE=1, amyloid beta protein=14, neurofibrillary tangles=12, Lewy bodies=19.

**eTable 4.** Hazard ratios (HRs) with 95% CIs of dementia and Alzheimer disease–related dementia in relation to cognitive reserve among participants with autopsies

| Cognitive reserve        | No. of subjects  | Dementia |                          |                          |                          | Alzheimer disease–related dementia |                          |                          |                          |
|--------------------------|------------------|----------|--------------------------|--------------------------|--------------------------|------------------------------------|--------------------------|--------------------------|--------------------------|
|                          |                  | n        | HR (95% CI) <sup>a</sup> | HR (95% CI) <sup>b</sup> | HR (95% CI) <sup>c</sup> | n                                  | HR (95% CI) <sup>a</sup> | HR (95% CI) <sup>b</sup> | HR (95% CI) <sup>c</sup> |
| Continuous               | 550 <sup>d</sup> | 217      | 0.94 (0.88–0.99)         | 0.95 (0.89–1.00)         | 0.93 (0.88–0.99)         | 201                                | 0.93 (0.88–0.99)         | 0.95 (0.89–1.00)         | 0.94 (0.88–1.00)         |
| Categorical              |                  |          |                          |                          |                          |                                    |                          |                          |                          |
| Lowest                   | 189              | 89       | Reference                | Reference                | Reference                | 83                                 | Reference                | Reference                | Reference                |
| Middle                   | 181              | 64       | 0.77 (0.55–1.07)         | 0.81 (0.58–1.12)         | 0.83 (0.60–1.16)         | 58                                 | 0.75 (0.53–1.06)         | 0.80 (0.57–1.13)         | 0.83 (0.58–1.18)         |
| Highest                  | 180              | 64       | 0.60 (0.42–0.85)         | 0.63 (0.45–0.90)         | 0.60 (0.42–0.86)         | 60                                 | 0.59 (0.41–0.85)         | 0.64 (0.44–0.91)         | 0.60 (0.41–0.87)         |
| <i>P</i> value for trend |                  |          | 0.77 (0.65–0.92)         | 0.79 (0.67–0.95)         | 0.77 (0.65–0.92)         |                                    | 0.77 (0.64–0.92)         | 0.80 (0.67–0.96)         | 0.78 (0.65–0.93)         |
|                          |                  |          | .004                     | .01                      | .003                     |                                    | .004                     | .01                      | .006                     |

<sup>a</sup> Adjusted for age, sex, smoking, alcohol consumption, BMI, physical activity, heart disease, hypertension, cerebrovascular diseases, diabetes, *APOE* ε4, and MMSE.

<sup>b</sup> Additionally adjusted for global AD pathology burden.

<sup>c</sup> Further adjusted for other brain pathologies including chronic gross infarcts, microscopic infarcts, cerebral atherosclerosis, cerebral amyloid angiopathy, arteriolosclerosis, Lewy bodies and hippocampal sclerosis.

<sup>d</sup> Numbers of participants with missing values were 11 for BMI, 26 for cerebrovascular disease, 6 for *APOE* ε4, 1 for MMSE, and 19 for Lewy bodies.

**eTable 5.** Incidence rates (per 1000 person-years) of dementia and Alzheimer disease–related dementia by different levels of cognitive reserve and brain pathologies

| Brain pathologies          | Cognitive reserve | No. of total | Dementia |                          | Alzheimer disease–related dementia |                          |
|----------------------------|-------------------|--------------|----------|--------------------------|------------------------------------|--------------------------|
|                            |                   |              | n        | IR (95% CI) <sup>a</sup> | n                                  | IR (95% CI) <sup>a</sup> |
| Global AD pathology burden |                   |              |          |                          |                                    |                          |
| Low                        |                   |              |          | 58.78 (45.39–72.18)      |                                    | 55.06 (41.69–68.44)      |
|                            | Lowest            | 90           | 31       | 71.51 (45.80–97.22)      | 29                                 | 69.28 (43.73–94.84)      |
|                            | Middle            | 91           | 21       | 48.91 (26.97–70.86)      | 17                                 | 42.22 (21.27–63.17)      |
|                            | Highest           | 101          | 28       | 53.20 (32.49–73.90)      | 25                                 | 49.95 (29.30–70.59)      |
| High                       |                   |              |          | 100.39 (83.40–117.38)    |                                    | 97.11 (80.19–114.03)     |
|                            | Lowest            | 99           | 58       | 117.12 (87.22–147.02)    | 54                                 | 111.13 (81.70–140.55)    |
|                            | Middle            | 90           | 43       | 105.37 (73.73–136.99)    | 41                                 | 104.12 (72.05–136.19)    |
|                            | Highest           | 79           | 36       | 72.85 (48.80–96.90) *    | 35                                 | 71.12 (47.25–94.99) *    |
| Gross infarcts             |                   |              |          |                          |                                    |                          |
| None                       |                   |              |          | 70.97 (58.22–83.73)      |                                    | 68.92 (56.21–81.63)      |
|                            | Lowest            | 107          | 43       | 90.76 (64.35–117.18)     | 41                                 | 87.84 (61.45–114.23)     |
|                            | Middle            | 109          | 32       | 62.05 (40.27–83.84)      | 31                                 | 61.04 (39.23–82.85)      |
|                            | Highest           | 134          | 46       | 61.43 (43.32–79.53)      | 44                                 | 59.32 (41.44–77.21)      |
| Any                        |                   |              |          | 94.78 (75.16–114.40)     |                                    | 88.46 (69.01–107.90)     |
|                            | Lowest            | 82           | 46       | 119.27 (83.26–155.28)    | 42                                 | 113.67 (77.74–149.60)    |
|                            | Middle            | 72           | 32       | 93.07 (60.67–125.47)     | 27                                 | 85.61 (53.33–117.89)     |
|                            | Highest           | 46           | 18       | 53.47(28.21–78.73) **    | 16                                 | 48.53 (24.11–72.96) **   |
| Microscopic infarcts       |                   |              |          |                          |                                    |                          |
| None                       |                   |              |          | 76.43 (63.79–89.08)      |                                    | 74.30 (61.70–86.90)      |
|                            | Lowest            | 138          | 63       | 93.71 (70.13–117.30)     | 60                                 | 91.75 (68.06–115.43)     |
|                            | Middle            | 131          | 44       | 74.16 (51.59–96.74)      | 42                                 | 72.43 (49.83–95.03)      |
|                            | Highest           | 132          | 45       | 58.01 (40.25–75.77) *    | 43                                 | 55.52 (38.11–72.93) *    |
| Any                        |                   |              |          | 94.27 (70.93–117.61)     |                                    | 86.99 (63.76–110.21)     |
|                            | Lowest            | 60           | 32       | 120.49 (75.49–165.48)    | 28                                 | 113.86 (68.04–159.68)    |
|                            | Middle            | 55           | 22       | 89.44 (50.39–128.48)     | 18                                 | 79.23 (41.15–117.31)     |
|                            | Highest           | 53           | 22       | 67.42 (37.96–96.88) *    | 20                                 | 64.70 (34.93–94.47) *    |

<sup>a</sup> Adjusted for age, sex, smoking, alcohol consumption, BMI, physical activity, heart disease, hypertension, cerebrovascular disease, diabetes and APOE ε4;

\*vs. lowest CR:  $P < .05$ ,

\*\* vs. lowest CR:  $P < .01$

Number of participants had missing data: BMI=11, cerebrovascular disease=26, APOE ε4=6.



**eTable 6.** Hazard ratios (HRs) with 95% CIs of the association of levels of cognitive reserve with dementia and Alzheimer disease–related dementia with multiple imputation for missing data

| Cognitive reserve      | No. of subjects   | Dementia |                          |                          | Alzheimer disease–related dementia |                          |                          |
|------------------------|-------------------|----------|--------------------------|--------------------------|------------------------------------|--------------------------|--------------------------|
|                        |                   | n        | HR (95% CI) <sup>a</sup> | HR (95% CI) <sup>b</sup> | n                                  | HR (95% CI) <sup>a</sup> | HR (95% CI) <sup>b</sup> |
| Continuous             | 1530 <sup>c</sup> | 378      | 0.89 (0.85–0.93)         | 0.92 (0.88–0.97)         | 348                                | 0.89 (0.85–0.93)         | 0.92 (0.88–0.97)         |
| Categorical (tertiles) |                   |          |                          |                          |                                    |                          |                          |
| Lowest                 | 509               | 148      | Reference                | Reference                | 136                                | Reference                | Reference                |
| Middle                 | 504               | 117      | 0.74 (0.58–0.94)         | 0.81 (0.63–1.03)         | 108                                | 0.74 (0.57–0.95)         | 0.80 (0.62–1.04)         |
| Highest                | 517               | 113      | 0.59 (0.46–0.76)         | 0.66 (0.51–0.86)         | 104                                | 0.59 (0.46–0.77)         | 0.65 (0.50–0.86)         |
| <i>P for trend</i>     |                   |          | 0.77 (0.68–0.87)         | 0.81 (0.71–0.93)         |                                    | 0.77 (0.67–0.87)         | 0.81 (0.70–0.93)         |
|                        |                   |          | <.001                    | .002                     |                                    | <.001                    | .003                     |

<sup>a</sup> Adjusted for age and sex.

<sup>b</sup> Adjusted for age, sex, smoking, alcohol consumption, BMI, physical activity, heart disease, hypertension, cerebrovascular diseases, diabetes, APOE ε4, death and MMSE.

<sup>c</sup> Missing data (BMI=30, alcohol consumption=1, cerebrovascular disease=139, heart disease=1, APOE ε4=72, MMSE=1)

**eTable 7.** Hazard ratios (HRs) and 95% CIs of the association of cognitive reserve with dementia and Alzheimer disease–related dementia after excluding MCI

| Cognitive reserve      | No. of subjects   | Dementia |                          |                          | Alzheimer disease–related dementia |                          |                          |
|------------------------|-------------------|----------|--------------------------|--------------------------|------------------------------------|--------------------------|--------------------------|
|                        |                   | n        | HR (95% CI) <sup>a</sup> | HR (95% CI) <sup>b</sup> | n                                  | HR (95% CI) <sup>a</sup> | HR (95% CI) <sup>b</sup> |
| Continuous             | 1018 <sup>c</sup> | 197      | 0.90 (0.85–0.96)         | 0.90 (0.84–0.96)         | 176                                | 0.89 (0.84–0.95)         | 0.89 (0.83–0.95)         |
| Categorical (tertiles) |                   |          |                          |                          |                                    |                          |                          |
| Lowest                 | 307               | 73       | Reference                | Reference                | 66                                 | Reference                | Reference                |
| Middle                 | 341               | 62       | 0.74 (0.53–1.04)         | 0.75 (0.53–1.06)         | 55                                 | 0.73 (0.51–1.05)         | 0.74 (0.51–1.08)         |
| Highest                | 370               | 62       | 0.56 (0.40–0.79)         | 0.54 (0.38–0.77)         | 55                                 | 0.54 (0.38–0.78)         | 0.52 (0.35–0.76)         |
| <i>P for trend</i>     |                   |          | 0.75 (0.63–0.89)         | 0.74 (0.61–0.88)         |                                    | 0.74 (0.61–0.88)         | 0.72 (0.59–0.87)         |
|                        |                   |          | <.001                    | .001                     |                                    | <.001                    | <.001                    |

MCI: mild cognitive impairment

<sup>a</sup> Adjusted for age and sex

<sup>b</sup> Adjusted for age, sex, smoking, alcohol consumption, BMI, physical activity, heart disease, hypertension, cerebrovascular diseases, diabetes, APOE ε4, death and MMSE.

<sup>c</sup> Missing data (BMI=23, cerebrovascular disease=99, heart disease=1, APOE ε4=44)

**eTable 8.** Hazard ratios (HRs) and 95% CIs of the association of cognitive reserve with dementia and Alzheimer disease–related dementia among all participants: results from competing risk models

| Cognitive reserve      | No. of subjects   | Dementia |                          |                          | Alzheimer disease–related dementia |                          |                          |
|------------------------|-------------------|----------|--------------------------|--------------------------|------------------------------------|--------------------------|--------------------------|
|                        |                   | n        | HR (95% CI) <sup>a</sup> | HR (95% CI) <sup>b</sup> | n                                  | HR (95% CI) <sup>a</sup> | HR (95% CI) <sup>b</sup> |
| Continuous             | 1364 <sup>c</sup> | 349      | 0.92 (0.88–0.96)         | 0.94 (0.89–0.99)         | 320                                | 0.92 (0.88–0.97)         | 0.94 (0.89–0.99)         |
| Categorical (tertiles) |                   |          |                          |                          |                                    |                          |                          |
| Lowest                 | 442               | 138      | Reference                | Reference                | 126                                | Reference                | Reference                |
| Middle                 | 453               | 108      | 0.70 (0.54–0.91)         | 0.74 (0.56–0.97)         | 99                                 | 0.70 (0.54–0.92)         | 0.74 (0.56–0.98)         |
| Highest                | 469               | 103      | 0.66 (0.51–0.85)         | 0.68 (0.51–0.89)         | 95                                 | 0.66 (0.51–0.86)         | 0.68 (0.51–0.91)         |
| <i>P for trend</i>     |                   |          | 0.81 (0.71–0.92)         | 0.82 (0.71–0.94)         |                                    | 0.81 (0.71–0.93)         | 0.82 (0.71–0.95)         |
|                        |                   |          | .001                     | .005                     |                                    | .002                     | .009                     |

<sup>a</sup> Adjusted for age and sex.

<sup>b</sup> Adjusted for age, sex, smoking, alcohol consumption, BMI, physical activity, heart disease, hypertension, cerebrovascular disease, diabetes, APOE ε4, and MMSE.

<sup>c</sup> Missing data (BMI=30, alcohol consumption=1, cerebrovascular disease=139, heart disease=1, APOE ε4=72, MMSE=1)

**eTable 9.** Hazard ratios (HRs) and 95% CIs of the association of cognitive reserve<sup>a</sup> with dementia and Alzheimer disease–related dementia among all participants

| Cognitive reserve      | No. of subjects   | Dementia |                          |                          | Alzheimer disease–related dementia |                          |                          |
|------------------------|-------------------|----------|--------------------------|--------------------------|------------------------------------|--------------------------|--------------------------|
|                        |                   | n        | HR (95% CI) <sup>b</sup> | HR (95% CI) <sup>c</sup> | n                                  | HR (95% CI) <sup>b</sup> | HR (95% CI) <sup>c</sup> |
| Continuous             | 1364 <sup>d</sup> | 349      | 0.39 (0.27–0.56)         | 0.54 (0.37–0.79)         | 320                                | 0.39 (0.27–0.57)         | 0.52 (0.35–0.76)         |
| Categorical (tertiles) |                   |          |                          |                          |                                    |                          |                          |
| Lowest                 | 441               | 140      | Reference                | Reference                | 128                                | Reference                | Reference                |
| Middle                 | 451               | 105      | 0.69 (0.53–0.89)         | 0.76 (0.58–0.98)         | 96                                 | 0.69 (0.53–0.90)         | 0.75 (0.57–0.98)         |
| Highest                | 472               | 104      | 0.54 (0.42–0.70)         | 0.60 (0.45–0.78)         | 96                                 | 0.54 (0.42–0.71)         | 0.59 (0.44–0.78)         |
| <i>P for trend</i>     |                   |          | 0.73 (0.64–0.83)         | 0.78 (0.68–0.89)         |                                    | 0.74 (0.64–0.84)         | 0.77 (0.67–0.88)         |
|                        |                   |          | <.001                    | <.001                    |                                    | <.001                    | <.001                    |

<sup>a</sup> Included early-, mid- and late-life cognitive activities and social activity in late life.

<sup>b</sup> Adjusted for age and sex.

<sup>c</sup> Adjusted for age, sex, smoking, alcohol consumption, BMI, physical activity, heart disease, hypertension, cerebrovascular disease, diabetes, *APOE* ε4, and MMSE.

<sup>d</sup> Missing data (BMI=30, alcohol consumption=1, cerebrovascular disease=139, heart disease=1, *APOE* ε4=72, MMSE=1)

**eTable 10.** Hazard ratios (HRs) and 95% CIs of the association of cognitive reserve<sup>a</sup> with dementia and Alzheimer disease–related dementia among all participants

| Cognitive reserve      | No. of subjects   | Dementia |                          |                          | Alzheimer disease–related dementia |                          |                          |
|------------------------|-------------------|----------|--------------------------|--------------------------|------------------------------------|--------------------------|--------------------------|
|                        |                   | n        | HR (95% CI) <sup>b</sup> | HR (95% CI) <sup>c</sup> | n                                  | HR (95% CI) <sup>b</sup> | HR (95% CI) <sup>c</sup> |
| Continuous             | 1364 <sup>d</sup> | 349      | 0.89 (0.84–0.94)         | 0.93 (0.87–0.98)         | 320                                | 0.89 (0.83–0.94)         | 0.92 (0.87–0.98)         |
| Categorical (tertiles) |                   |          |                          |                          |                                    |                          |                          |
| Lowest                 | 442               | 135      | Reference                | Reference                | 122                                | Reference                | Reference                |
| Middle                 | 459               | 109      | 0.66 (0.51–0.85)         | 0.74 (0.57–0.96)         | 102                                | 0.67 (0.52–0.88)         | 0.75 (0.57–0.98)         |
| Highest                | 463               | 105      | 0.61 (0.48–0.79)         | 0.70 (0.54–0.92)         | 96                                 | 0.62 (0.47–0.81)         | 0.69 (0.52–0.92)         |
| <i>P for trend</i>     |                   |          | 0.78 (0.68–0.89)         | 0.84 (0.74–0.97)         |                                    | 0.78 (0.68–0.90)         | 0.83 (0.72–0.96)         |
|                        |                   |          | <.001                    | .02                      |                                    | <.001                    | .01                      |

<sup>a</sup> Included education, early- and mid-life cognitive activities.

<sup>b</sup> Adjusted for age and sex.

<sup>c</sup> Adjusted for age, sex, smoking, alcohol consumption, BMI, physical activity, heart disease, hypertension, cerebrovascular disease, diabetes, *APOE* ε4, and MMSE.

<sup>d</sup> Missing data (BMI=30, alcohol consumption=1, cerebrovascular disease=139, heart disease=1, *APOE* ε4=72, MMSE=1)

**eTable 11.** Hazard ratios (HRs) and 95% CIs of the associations of individual cognitive reserve indicators with dementia and Alzheimer disease–related dementia among all participants

| Cognitive reserve indicator   | Dementia                 |                          | Alzheimer disease–related dementia |                          |
|-------------------------------|--------------------------|--------------------------|------------------------------------|--------------------------|
|                               | HR (95% CI) <sup>a</sup> | HR (95% CI) <sup>b</sup> | HR (95% CI) <sup>a</sup>           | HR (95% CI) <sup>b</sup> |
| Years of education            | 0.97 (0.93–1.00)         | 1.01 (0.98–1.06)         | 0.97 (0.94–1.00)                   | 1.02 (0.98–1.06)         |
| Early-life cognitive activity | 0.77 (0.65–0.92)         | 0.86 (0.72–1.03)         | 0.78 (0.65–0.93)                   | 0.87 (0.72–1.05)         |
| Mid-life cognitive activity   | 0.70 (0.60–0.82)         | 0.80 (0.68–0.94)         | 0.70 (0.59–0.82)                   | 0.80 (0.67–0.95)         |
| Late-life cognitive activity  | 0.70 (0.61–0.79)         | 0.78 (0.67–0.90)         | 0.71 (0.62–0.82)                   | 0.80 (0.69–0.93)         |
| Social activity in late life  | 0.61 (0.50–0.74)         | 0.69 (0.56–0.85)         | 0.58 (0.47–0.71)                   | 0.65 (0.53–0.81)         |
| Social network                | 0.98 (0.96–1.00)         | 0.98 (0.96–0.99)         | 0.98 (0.96–1.00)                   | 0.98 (0.96–1.00)         |

<sup>a</sup> Adjusted for age and sex.

<sup>b</sup> Adjusted for age, sex, smoking, alcohol consumption, BMI, physical activity, heart disease, hypertension, cerebrovascular disease, diabetes, *APOE* ε4, death and MMSE.

Missing data (BMI=30, alcohol consumption=1, cerebrovascular disease=139, heart disease=1, *APOE* ε4=72, MMSE=

**eFigure 1.** Participant flow chart

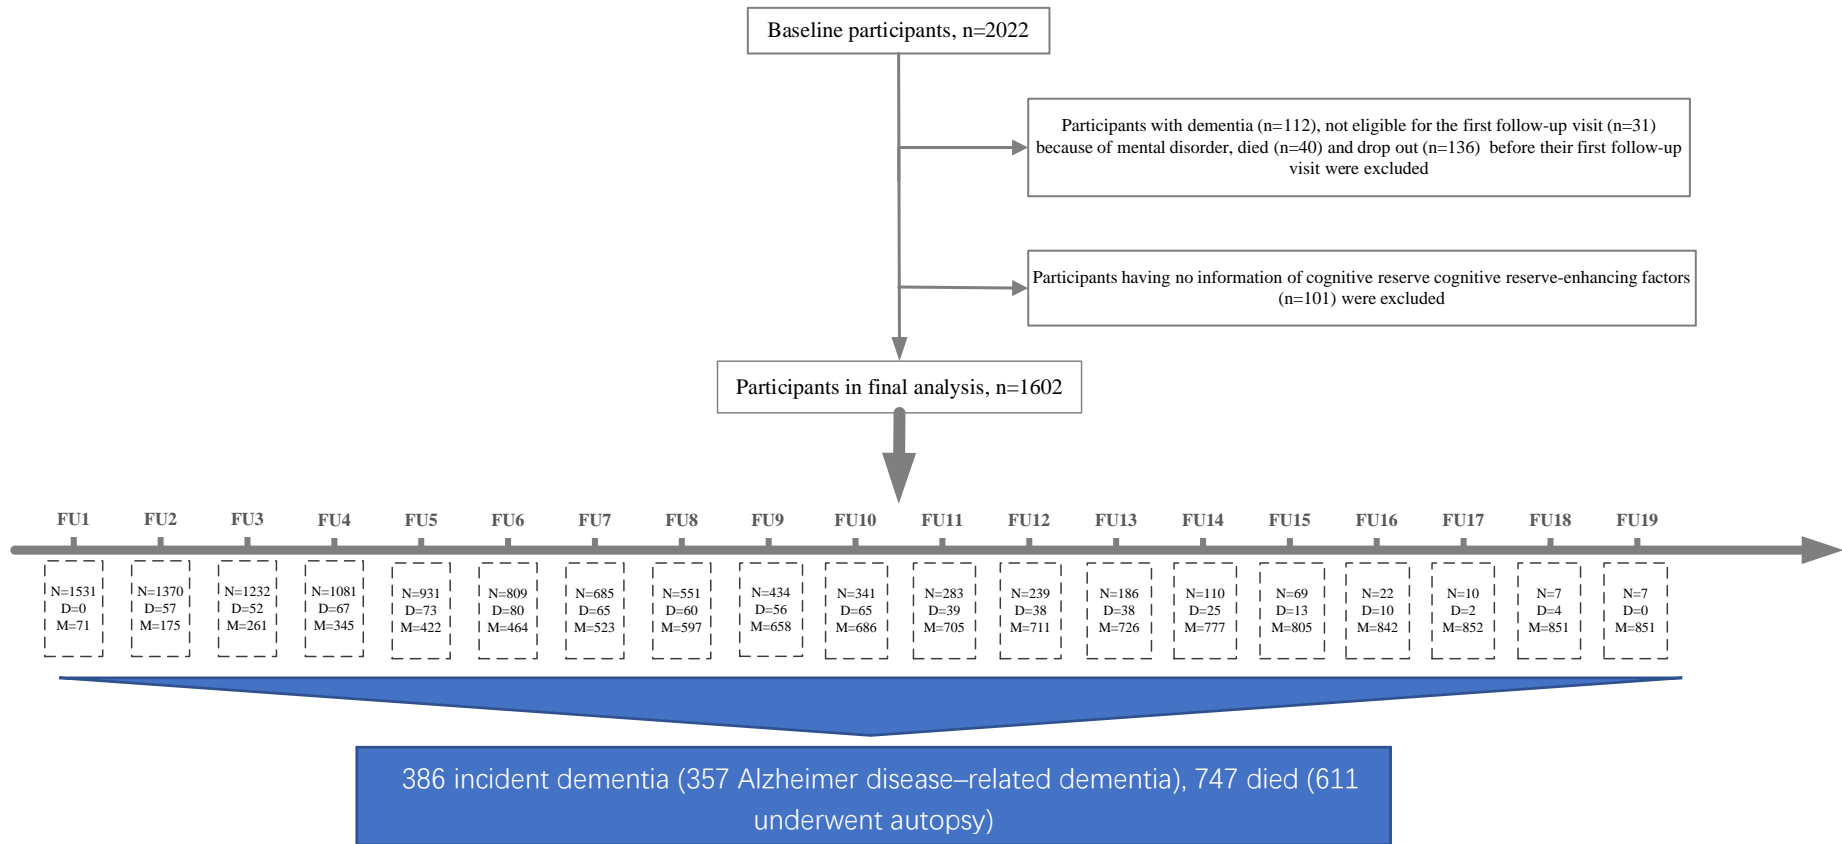

**eFigure 2.** Kaplan-Meier survival curves of dementia by cognitive reserve

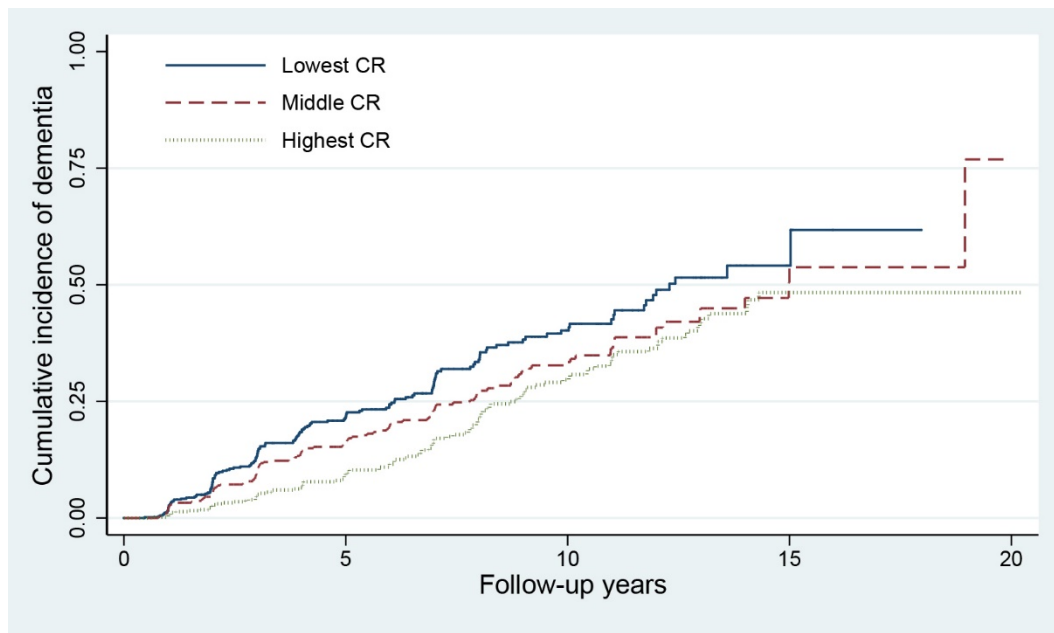

Supplement: jamaneurol-76-1184-s001.pdf [file jamaneurol-76-1184-s001.pdf]
